# Supplementary material for: NMR Profiling of Ononis diffusa Identifies Cytotoxic Compounds against Cetuximab-Resistant Colon Cancer Cell Lines
Source: MDPI journal article supplement (doi:10.3390/molecules26113266), 2021-05-28
Supplement: s1 [file s1]

# **NMR profiling of *Ononis diffusa* identifies cytotoxic compounds against cetuximab-resistant colon cancer cell lines**

Vittoria Graziani <sup>1,2</sup>, Nicoletta Potenza <sup>1</sup>, Brigida D'Abrosca <sup>1</sup>, Teresa Troiani <sup>3</sup>, Stefania Napolitano <sup>3</sup>, Antonio Fiorentino <sup>1,\*</sup> and Monica Scognamiglio <sup>1,\*</sup>

## **SUPPLEMENTARY MATERIAL**

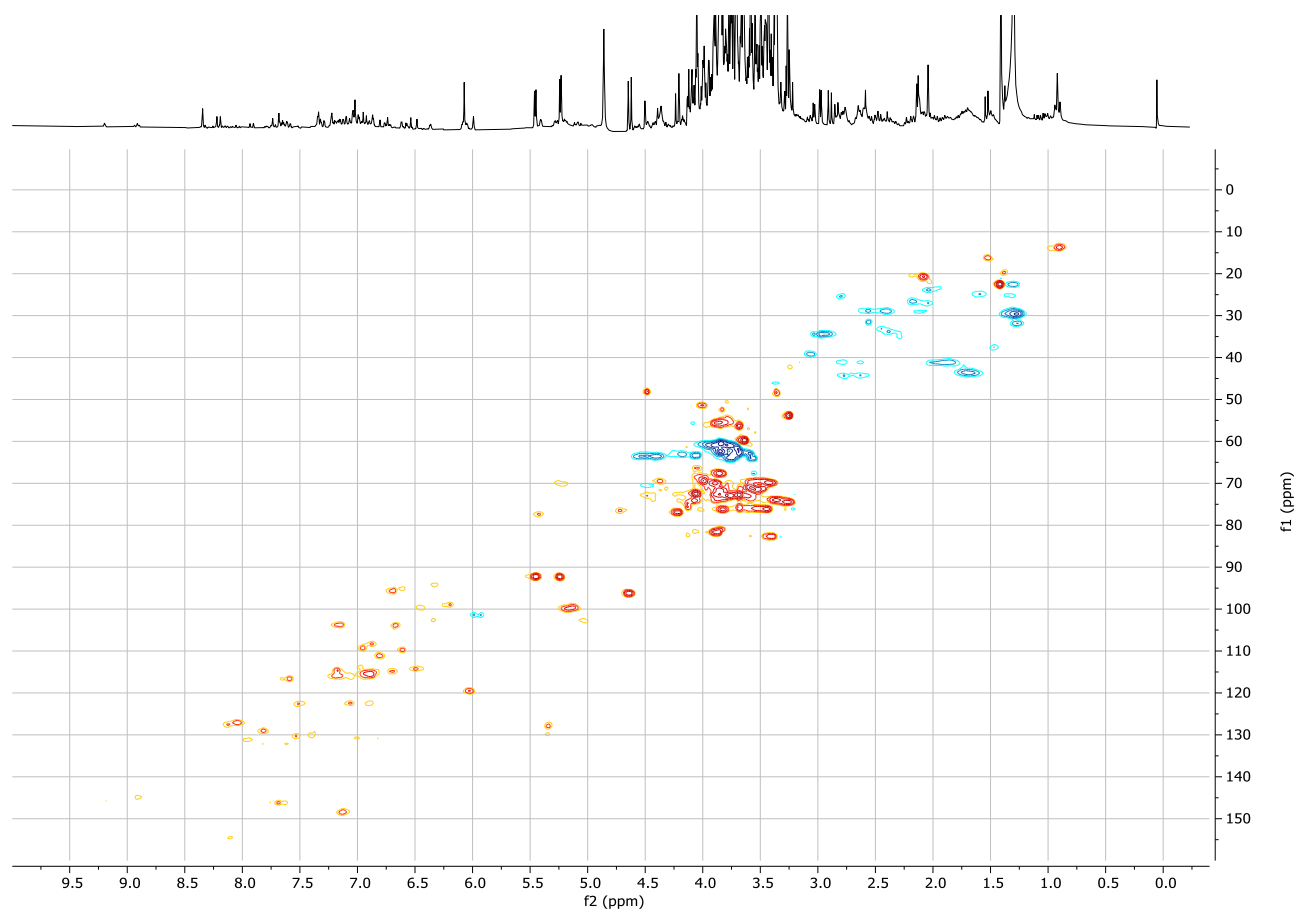

**Figure S1.** HSQC of *O. diffusa* extract

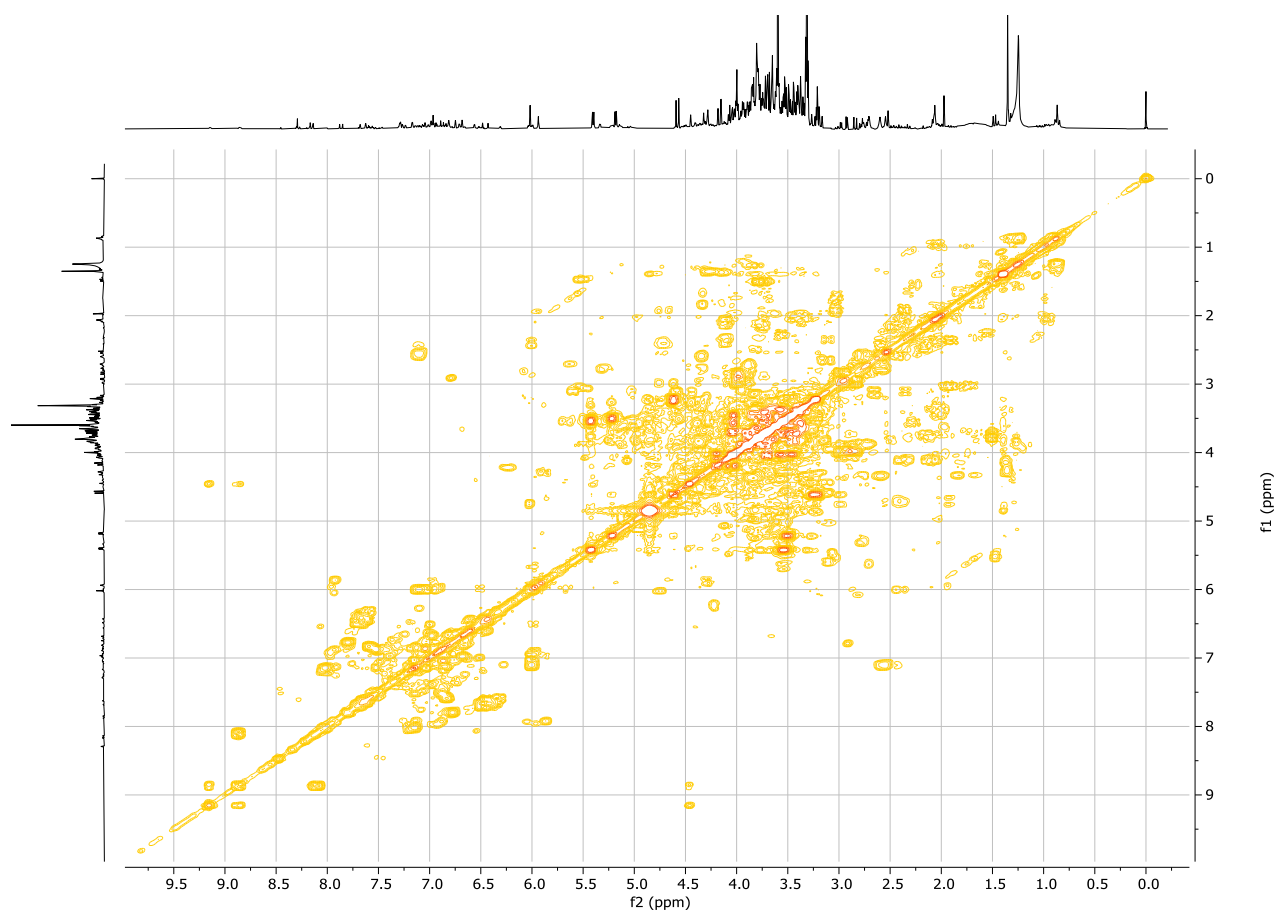

**Figure S2.** COSY of *O. diffusa* extract

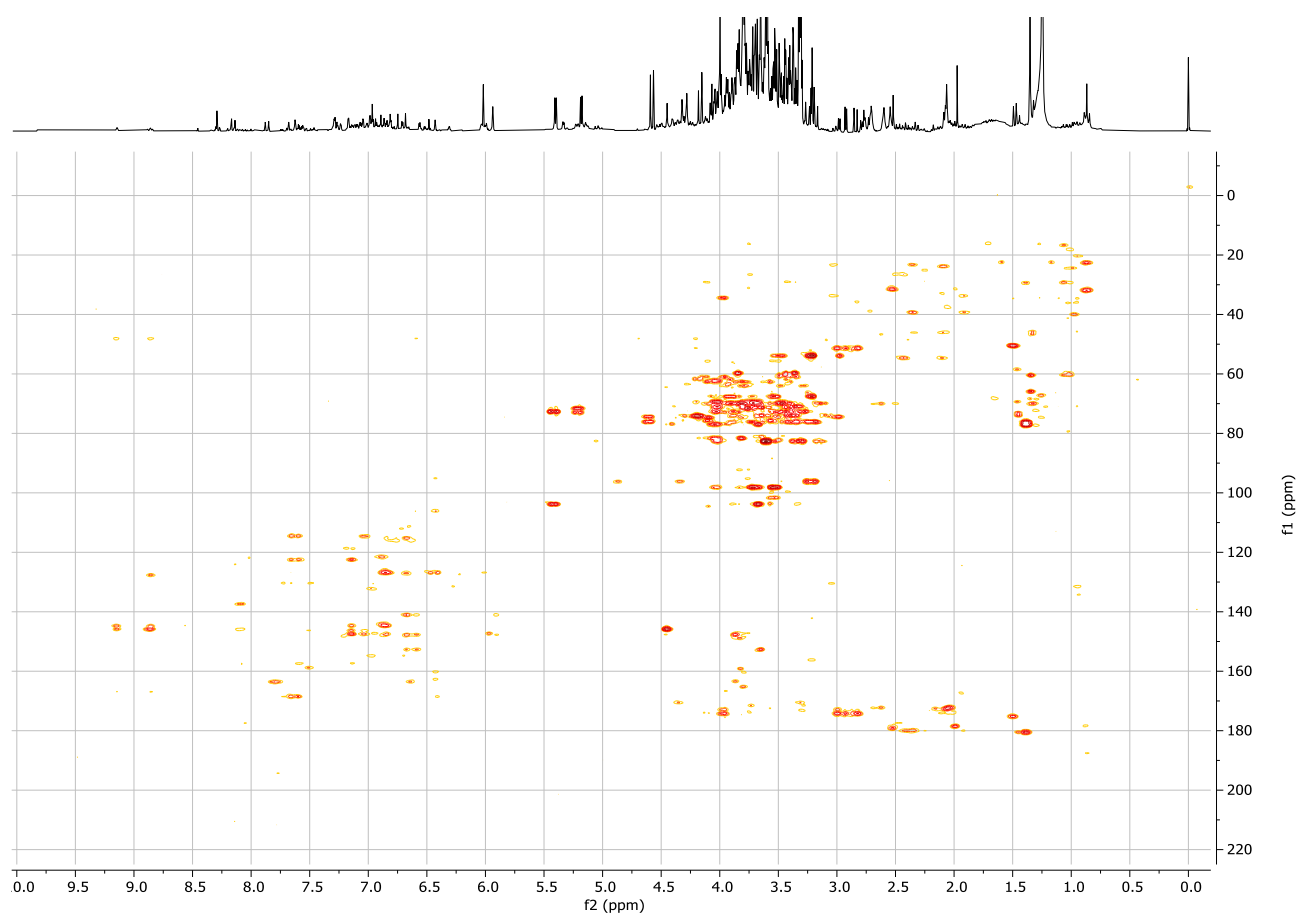

**Figure S3.** HMBC of *O. diffusa* extract

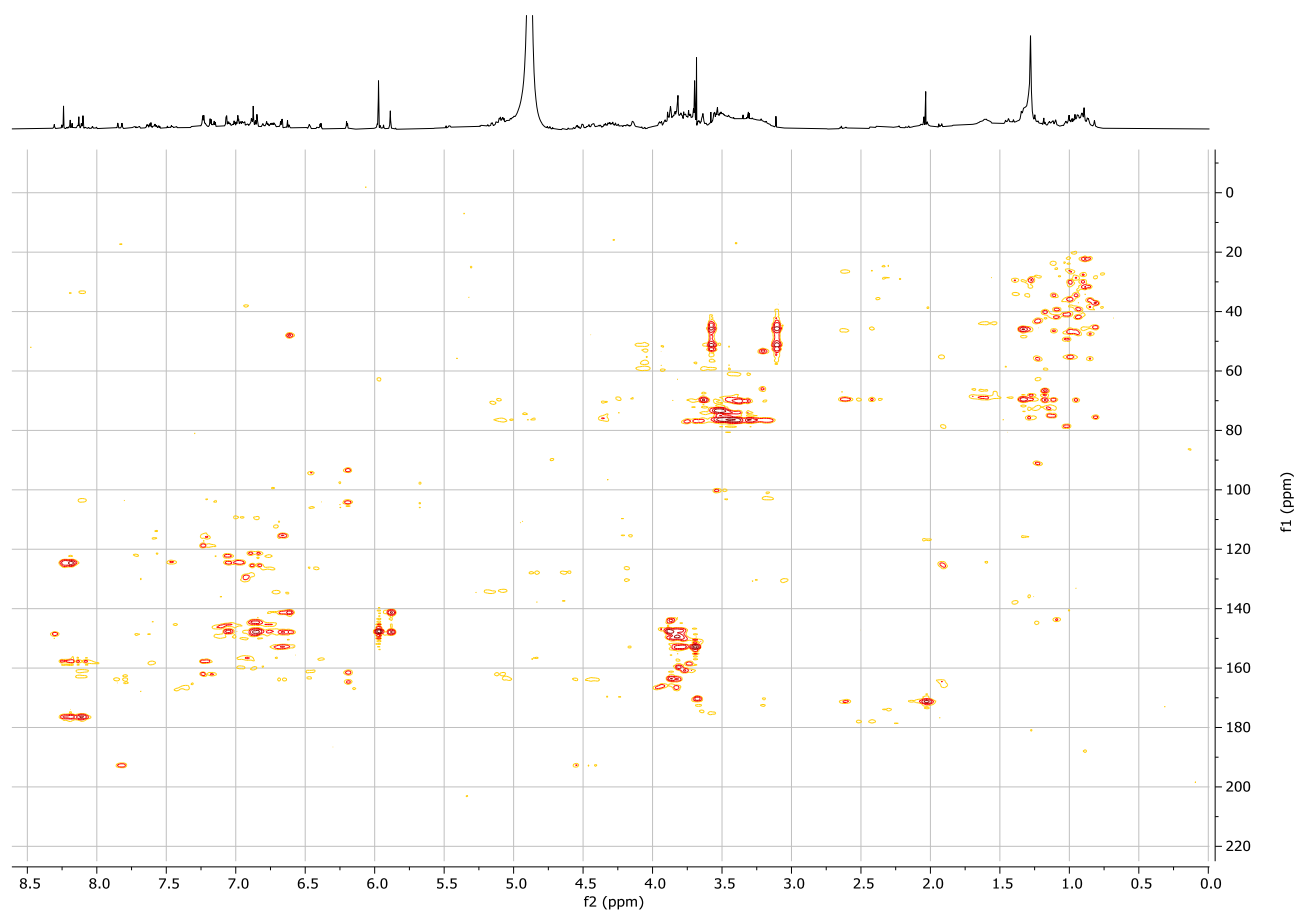

**Figure S4.** CIGAR-HMBC of OdM fraction

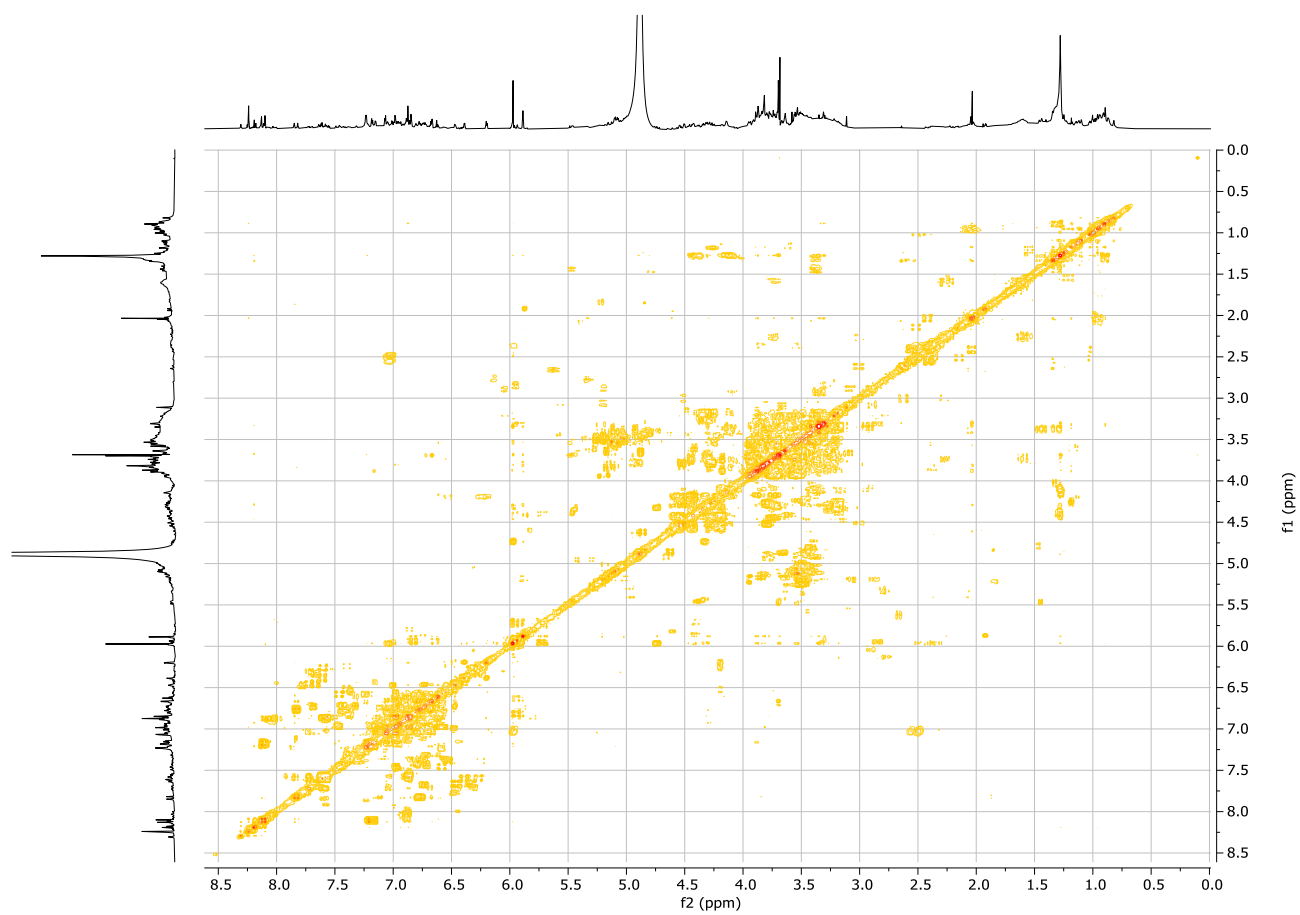

**Figure S5.** COSY of OdM fraction
